# Supplementary material for: Unveiling the redox-active character of imidazolin-2-thiones derived from amino-substituted N-heterocyclic carbenes
Source: Royal Society of Chemistry journal article supplement (doi:10.1039/c8cc03934h), 2018-01-01

# Unveiling the redox-active character of imidazolin-2-thiones derived from amino-substituted N-Heterocyclic Carbenes

*Mirko Ruamps, Stéphanie Bastin, Lionel Rechignat, Alix Sournia-Saquet, Dmitry A. Valyaev, Jean-Marie Mouesca, Noël Lugan, Vincent Maurel, Vincent César*

## Supporting Information

### Contents

|                                |           |
|--------------------------------|-----------|
| <b>Materials and methods</b>   | <b>2</b>  |
| <b>Synthetic procedures</b>    | <b>2</b>  |
| <b>X-Ray crystallography</b>   | <b>4</b>  |
| <b>Electrochemical studies</b> | <b>5</b>  |
| <b>EPR spectroscopy</b>        | <b>7</b>  |
| <b>UV-Vis spectroscopy</b>     | <b>8</b>  |
| <b>DFT calculations</b>        | <b>9</b>  |
| <b>NMR spectra</b>             | <b>22</b> |

## Materials and methods

All manipulations were performed under an inert atmosphere of dry nitrogen by using standard vacuum line and Schlenk tube techniques. Glassware was dried at 120°C in an oven for at least three hours. THF, diethyl ether, pentane, toluene and CH<sub>2</sub>Cl<sub>2</sub> were dried using an Innovative Technology solvent purification system. Acetonitrile was dried over P<sub>4</sub>O<sub>10</sub> and subsequently distilled.

Imidazolium salts IMesHCl,<sup>1</sup> IMes<sup>(NMe<sub>2</sub>)</sup>·HOTf,<sup>2</sup> and IMes<sup>(NMe<sub>2</sub>)<sub>2</sub></sup>·HOTf,<sup>2</sup> were prepared according to literature procedures. 1,1'-diacetylferricinium tetrafluoroborate was prepared through oxidation of 1,1'-diacetylferrocene by benzoquinone/HBF<sub>4</sub>·OEt<sub>2</sub> according to a literature procedure.<sup>3</sup> The 0.5 M solution of KHMDS in toluene was prepared by weighing 2.0 g of solid KHMDS (stored in glovebox) in a volumetric flask and adding toluene to complete to 20 mL. [NO](SbF<sub>6</sub>) (Aldrich) was stored in the glovebox. All other reagents were commercially available and used as received.

NMR spectra were recorded on Bruker AV300 or AV400 spectrometers. Chemical shifts are reported in ppm (δ) compared to TMS (<sup>1</sup>H and <sup>13</sup>C) using the residual peak of deuterated solvent as internal standard.<sup>4</sup> Elemental analyses were performed by the Microanalytical Service of the LCC and MS spectra (ESI mode) by the mass spectrometry service of the “Institut de Chimie de Toulouse”.

## Synthetic procedures

### 1,3-dimesityl-imidazolin-2-thione (1)

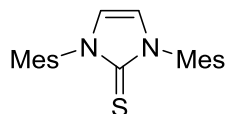

A solution of KHMDS (0.5 M in toluene, 2.2 mL, 1.1 mmol, 1.1 equiv.) was added dropwise to a solution of IMes·HCl (340.9 mg, 1.0 mmol) in THF (20 mL) at 0°C.

After 30 min, elemental sulfur (38.5 mg, 1.2 mmol, 1.2 equiv.) was added as a solid and the solution was slowly warmed up overnight. After evaporation of volatiles, the crude product was purified by column chromatography (SiO<sub>2</sub>, hexane/EtOAc : 4/1) to give an off-white powder (310 mg, 92%). <sup>1</sup>H NMR (400 MHz, CDCl<sub>3</sub>): δ = 7.02 (s, 4H, CH<sub>Mes</sub>), 6.80 (s, 2H, CH<sub>Im</sub>), 2.35 (s, 6H, CH<sub>3 para</sub>), 2.16 (s, 12H, CH<sub>3 ortho</sub>). <sup>13</sup>C{<sup>1</sup>H} NMR (101 MHz, CDCl<sub>3</sub>): δ = 163.5 (N<sub>2</sub>C=S), 139.3, 135.7, 133.7 (C<sub>Ar</sub>), 129.3 (CH<sub>Mes</sub>), 118.1 (CH<sub>Im</sub>), 21.3 (CH<sub>3 para</sub>), 18.0 (CH<sub>3 ortho</sub>). MS (ESI, positive mode): m/z (%): 337 (100) [M + H]<sup>+</sup>. Elemental analysis *calcd* (%) for C<sub>21</sub>H<sub>24</sub>N<sub>2</sub>S (MW = 336.50) + 0.05 CH<sub>2</sub>Cl<sub>2</sub>: C 74.2, H 7.1, N 8.2; *found*: C 74.2, H 6.8, N 8.2.

<sup>1</sup> L. Hintermann, *Beilstein J. Org. Chem.*, 2007, **3**, 22.

<sup>2</sup> Y. Zhang, V. César, G. Storch, N. Lugan and G. Lavigne, *Angew. Chem. Int. Ed.*, 2014, **53**, 6482.

<sup>3</sup> C. Guillon and P. Vierling, *J. Organomet. Chem.* 1994, **464**, C42.

<sup>4</sup> G. R. Fulmer, A. J. M. Miller, N. H. Sherden, H. E. Gottlieb, A. Nudelman, B. M. Stoltz, J. E. Bercaw and K. I. Goldberg, *Organometallics*, 2010, **29**, 2176.

### 1,3-dimesityl-4-(dimethylamino)imidazolin-2-thione (**1**<sup>NMe<sub>2</sub></sup>)

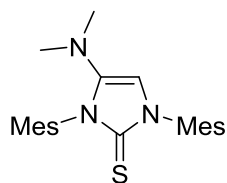

A solution of KHMDS (0.5 M in toluene, 1.1 mL, 0.55 mmol, 1.1 equiv.) was added dropwise to a solution of IMes<sup>(NMe<sub>2</sub>)</sup>·HOTf (249 mg, 0.5 mmol) in THF (10 mL) at 0°C. After 30 min, elemental sulfur (24 mg, 0.75 mmol, 1.5 equiv.) was added as a solid and the solution was slowly warmed up overnight. After evaporation of the volatiles, the crude residue was purified by column chromatography (SiO<sub>2</sub>, petroleum ether/EtOAc: 8/1) to yield a white powder (165 mg, 87%). <sup>1</sup>H NMR (400 MHz, CDCl<sub>3</sub>): δ = 7.00 (s, 2H, CH<sub>Mes</sub>), 6.98 (s, 2H, CH<sub>Mes</sub>), 6.09 (s, 1H, CH<sub>Im</sub>), 2.49 (s, 6H, N(CH<sub>3</sub>)<sub>2</sub>), 2.33 (s, 3H, CH<sub>3 para</sub>), 2.32 (s, 3H, CH<sub>3 para</sub>), 2.17 (s, 6H, CH<sub>3 ortho</sub>), 2.16 (s, 6H, CH<sub>3 ortho</sub>). <sup>13</sup>C{<sup>1</sup>H} NMR (101 MHz, CDCl<sub>3</sub>): δ = 160.7 (N<sub>2</sub>C=S), 142.5, 139.1, 138.9, 136.4, 135.8, 134.0, 132.3 (C<sub>Ar</sub>), 129.5, 129.2 (CH<sub>Mes</sub>), 101.8 (CH<sub>Im</sub>), 42.9 (N(CH<sub>3</sub>)<sub>2</sub>), 21.4, 21.3 (CH<sub>3 para</sub>), 18.3, 18.0 (CH<sub>3 ortho</sub>). MS (ESI, positive mode): m/z (%): 380 (100) [M + H]<sup>+</sup>. Elemental analysis *calcd* (%) for C<sub>23</sub>H<sub>29</sub>N<sub>3</sub>S (MW = 379.57): C 72.8, H 7.7, N 11.1; *found*: C 72.7, H 7.5, N 11.0.

### 1,3-dimesityl-4,5-bis(dimethylamino)imidazolin-2-thione (**1**<sup>(NMe<sub>2</sub>)<sub>2</sub></sup>)

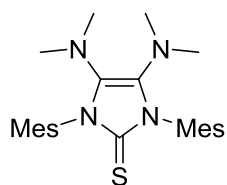

A solution of KHMDS (0.5 M in toluene, 1 mL, 0.5 mmol, 1.1 equiv.) was added dropwise to a solution of IMes<sup>(NMe<sub>2</sub>)<sub>2</sub></sup>·HOTf (248 mg, 0.45 mmol) in THF (20 mL) at – 80°C. After 30 min, elemental sulfur (22 mg, 0.66 mmol, 1.5 equiv.) was added as a solid and the solution was allowed to warm up to room temperature. All volatiles were evacuated *in vacuo* and the crude mixture was purified by column chromatography (SiO<sub>2</sub>, hexane/EtOAc : 4/1) to give a white powder (122 mg, 63%). Single crystals suitable for an X-Ray diffraction experiment were grown by slow evaporation of a saturated solution of **1**<sup>(NMe<sub>2</sub>)<sub>2</sub></sup> in CH<sub>2</sub>Cl<sub>2</sub>. <sup>1</sup>H NMR (400 MHz, CDCl<sub>3</sub>): δ = 6.97 (s, 4H, CH<sub>Mes</sub>), 2.59 (s, 12H, N(CH<sub>3</sub>)<sub>2</sub>), 2.32 (s, 6H, CH<sub>3 para</sub>), 2.17 (s, 12H, CH<sub>3 ortho</sub>). <sup>13</sup>C{<sup>1</sup>H} NMR (101 MHz, CDCl<sub>3</sub>): δ = 157.6 (N<sub>2</sub>C=S), 138.7, 136.4, 132.4, 131.0 (C<sub>Ar</sub>), 129.3 (CH<sub>Mes</sub>), 43.7 (N(CH<sub>3</sub>)<sub>2</sub>), 21.4 (CH<sub>3 para</sub>), 18.4 (CH<sub>3 ortho</sub>); MS (ESI, positive mode): m/z (%): 423 (100) [M + H]<sup>+</sup>; HRMS (ESI): *m/z*: *calcd.* for C<sub>25</sub>H<sub>35</sub>N<sub>4</sub>S: 423.2582; *found*: 423.2586, ε<sub>r</sub> = 0.9 ppm; Elemental analysis *calcd* (%) for C<sub>25</sub>H<sub>34</sub>N<sub>4</sub>S (MW = 422.64): C 71.05, H 8.1, N 13.2; *found*: C 70.9, H 8.1, N 12.9.

### Generation and EPR characterization of [**1**<sup>NMe<sub>2</sub></sup>]<sup>+</sup>

Solid 1,1'-diacetylferricinium tetrafluoroborate (4.3 mg, 12 μmol, 1.0 equiv.) was added to a solution of **1**<sup>NMe<sub>2</sub></sup> (4.55 mg, 12 μmol, 1.0 equiv.) in CH<sub>2</sub>Cl<sub>2</sub> (1 mL) at – 40°C. After 5 min, 50 μL of the reaction mixture were syringed in an EPR tube, which was completed with 50 μL of toluene. The EPR spectra were immediately recorded.

## Synthesis and isolation of $[1^{(\text{NMe}_2)_2}]^{+}$

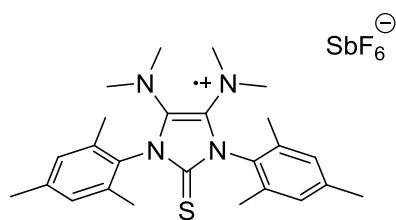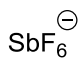

In a glove box, solid  $[\text{NO}](\text{SbF}_6)$  (34 mg, 0.128 mmol) was added all at once to a solution of thiourea  $1^{(\text{NMe}_2)_2}$  (59 mg, 0.139 mmol, 1.08 equiv.) in  $\text{CH}_2\text{Cl}_2$  (2 mL). The solution color changed immediately from colorless to dark violet. After 5 min, the reaction mixture was layered with  $\text{Et}_2\text{O}$  and placed into the deep freezer at  $-30^\circ\text{C}$ . After 3 days, the dark violet microcrystalline solid was filtered and dried under vacuum to give the pure title compound (75 mg, 89%). Elemental analysis *calcd* (%) for  $\text{C}_{25}\text{H}_{34}\text{F}_6\text{N}_4\text{SSb}$  (MW = 658.39): C 45.6, H 5.2, N 8.5; *found*: C 45.5, H 5.0, N 8.25. UV-vis ( $\text{CH}_2\text{Cl}_2$ ,  $\lambda_{\text{max}}$ , nm ( $\epsilon$ ,  $\text{M}^{-1} \text{cm}^{-1}$ )): 227 (23460), 324 (9700), 370 (12800), 580 (6400).

## Generation of $[1^{(\text{NMe}_2)_2}](\text{SbF}_6)_2$

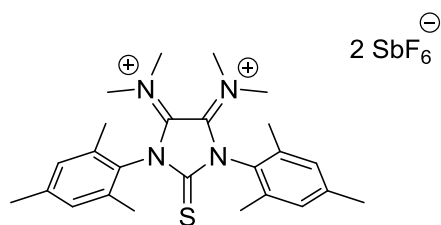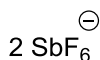

At  $-20^\circ\text{C}$ , the thiourea  $1^{(\text{NMe}_2)_2}$  (13.0 mg, 30.7  $\mu\text{mol}$ ) was added as a solid to a solution of  $[\text{NO}](\text{SbF}_6)$  (22 mg, 83  $\mu\text{mol}$ , 2.7 equiv.) in  $\text{CD}_3\text{CN}$  (0.7 mL). The mixture immediately turned to dark orange and was stirred for additional 30 min at that temperature. The cooling bath was removed and the solution was cannulated into a NMR tube and the NMR spectra were recorded. Single crystals suitable for an X-Ray diffraction experiment were grown by layering  $\text{Et}_2\text{O}$  onto a solution of  $[1^{(\text{NMe}_2)_2}](\text{SbF}_6)_2$  in  $\text{CH}_2\text{Cl}_2$  and a few drops of  $\text{CH}_3\text{CN}$  (to allow complete dissolution).  $^1\text{H}$  NMR (400 MHz,  $\text{CD}_3\text{CN}$ ):  $\delta$  = 7.20 (s, 4H,  $\text{CH}_{\text{Mes}}$ ), 3.85 (s, 6H,  $\text{N}(\text{CH}_3)_2$ ), 3.12 (s, 6H,  $\text{N}(\text{CH}_3)_2$ ), 2.38 (s, 6H,  $\text{CH}_3$  para), 2.25 (s, 12H,  $\text{CH}_3$  ortho).  $^{13}\text{C}\{^1\text{H}\}$  NMR (101 MHz,  $\text{CD}_3\text{CN}$ ):  $\delta$  = 170.7 ( $\text{N}_2\text{C}=\text{S}$ ), 155.2 ( $\text{C}=\text{NMe}_2$ ), 144.6, 137.3 ( $\text{C}_{\text{Mes}}$ ), 131.3 ( $\text{CH}_{\text{Mes}}$ ), 129.8 ( $\text{C}_{\text{Mes}}$ ), 51.0 ( $\text{N}(\text{CH}_3)_2$ ), 48.1 ( $\text{N}(\text{CH}_3)_2$ ), 21.2 ( $\text{CH}_3$  para), 18.5 ( $\text{CH}_3$  ortho).

## X-Ray Crystallography

Data were collected on a Bruker D8/APEX II/Incoatec I $\mu$ S Microsource diffractometer. All calculations were performed on a PC compatible computer using the WinGX system.<sup>5</sup> Full crystallographic data are given in Table S1. The structures were solved using the SIR92 program,<sup>6</sup> which revealed in each instance the position of most of the non-hydrogen atoms. All the remaining non-hydrogen atoms were located by the usual combination of full matrix least-squares refinement and difference electron density syntheses using the SHELX program.<sup>7</sup> Compound  $[2]\text{SbF}_6 \cdot \text{Et}_2\text{O}$  crystallizes as three independent motives per unit cell. Atomic scattering factors were taken from

<sup>5</sup> L. J. Farrugia, *J. Appl. Crystallogr.*, 1999, **32**, 837-838.

<sup>6</sup> A. Altomare, G. Cascarano, C. Giacovazzo and A. Guagliardi, *J. Appl. Crystallogr.*, 1994, **27**, 435-436.

<sup>7</sup> G. M. Sheldrick, *Acta Crystallogr.*, 2015, **C71**, 3-4.

the usual tabulations. Anomalous dispersion terms for the Sb and S atoms were included in Fc. All non-hydrogen atoms were allowed to vibrate anisotropically. The hydrogen atoms were generally set in idealized positions ( $R_3CH$ , C–H = 0.96 Å;  $R_2CH_2$ , C–H = 0.97 Å;  $RCH_3$ , C–H = 0.98 Å;  $C(sp^2)–H$  = 0.93 Å;  $U_{iso}$  1.2 or 1.5 times greater than the  $U_{eq}$  of the carbon atom to which the hydrogen atom is attached) and their positions refined as “riding” atoms. CCDC 1843369-1843370 contain the supplementary crystallographic data for the two structures unveiled in this paper. These data can be obtained free of charge from the Cambridge Crystallographic Data Centre via [www.ccdc.cam.ac.uk/data\\_request/cif](http://www.ccdc.cam.ac.uk/data_request/cif)

## Electrochemical studies

Cyclic voltammetric measurements were carried out with a Autolab PGSTAT100 potentiostat controlled by GPES 4.09 software. Experiments were performed under argon at room temperature in a homemade airtight three-electrode cell. The reference electrode consisted of a saturated calomel electrode (SCE) separated from the solution by a glass frit. The counter electrode was a platinum wire of ca. 1 cm<sup>2</sup> apparent surface. The working electrode was a Pt microdisk (0.5 mm diameter). The supporting electrolyte, (nBu<sub>4</sub>N)(PF<sub>6</sub>) (99% electrochemical grade), was dried at 120 °C and stored under Ar. The CH<sub>2</sub>Cl<sub>2</sub> solutions of **1**, **1**<sup>NMe<sub>2</sub></sup>, **1**<sup>(NMe<sub>2</sub>)<sub>2</sub></sup> used for the electrochemical studies were typically 10<sup>−3</sup> M in complex and 0.1 M in supporting electrolyte. Before each measurement, the solutions were degassed by bubbling Ar and the working electrode was polished with a polishing machine. Potentials are referenced to the SCE, and were calibrated using the Fc/Fc<sup>+</sup> couple by adding ferrocene (10<sup>−3</sup> M) at the end of the experiments. Under the experimental conditions employed in this work, the half-wave potential ( $E_{1/2}$ ) of the Fc<sup>+</sup>/Fc couple in CH<sub>2</sub>Cl<sub>2</sub> occurred at  $E_{1/2}$  = 0.46 V vs. SCE.

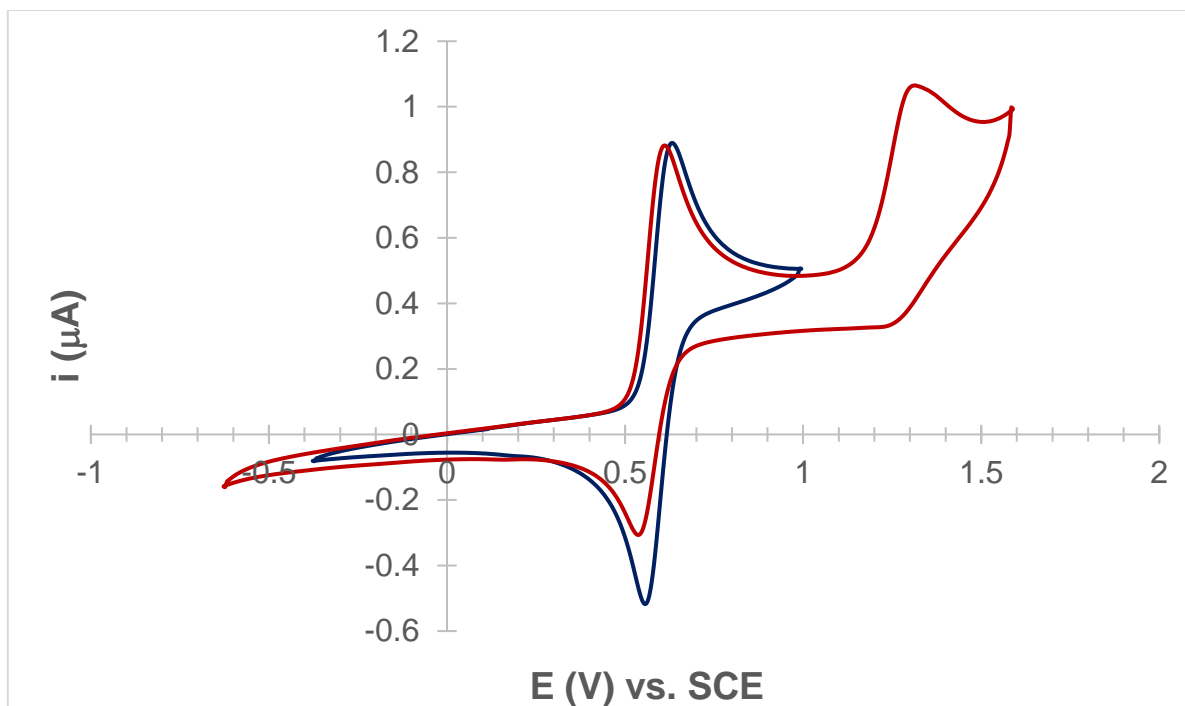

**Figure S1:** CV curves of  $[\text{IMes}^{(\text{NMe}_2)}]=\text{S}$  ( $\mathbf{1}^{\text{NMe}_2}$ ) using different potential ranges. Conditions:  $10^{-3}$  M in  $\text{CH}_2\text{Cl}_2$ , 0.1 M of  $\text{TBAPF}_6$ , scan rate =  $200 \text{ mV}\cdot\text{s}^{-1}$ , working electrode = Pt).

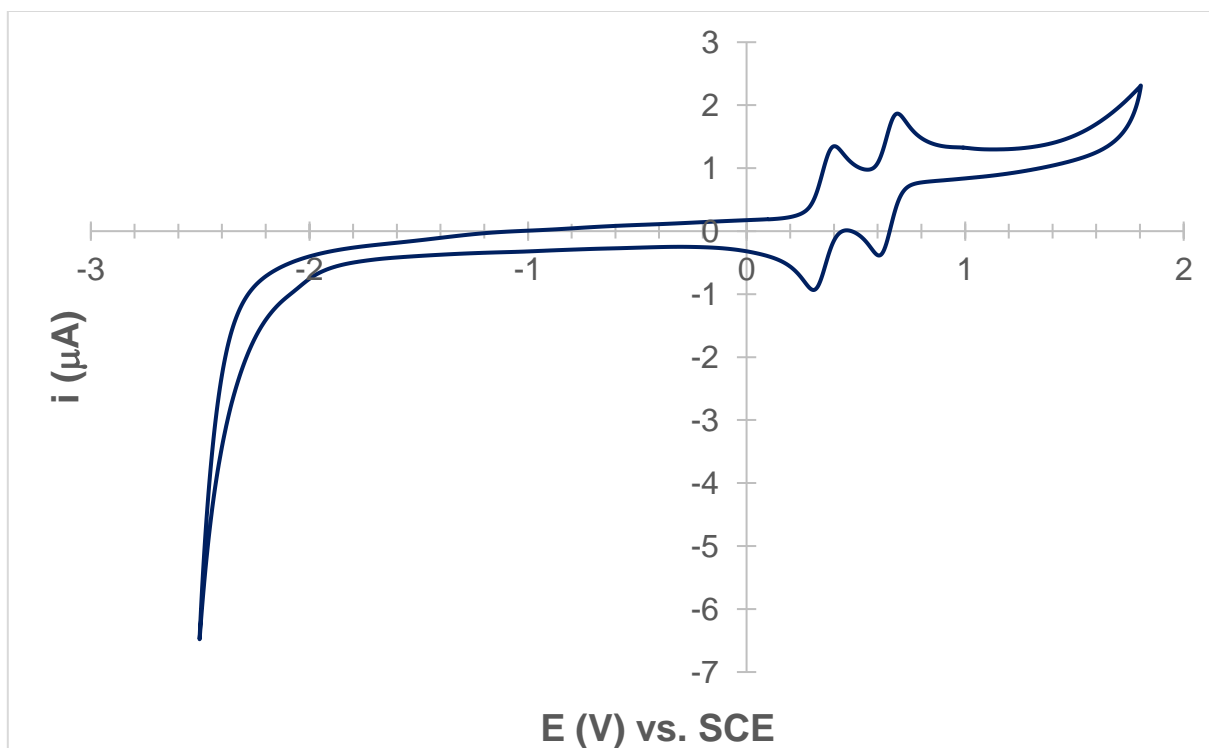

**Figure S2:** Full CV plot of  $[\text{IMes}^{(\text{NMe}_2)_2}]=\text{S}$  ( $\mathbf{1}^{(\text{NMe}_2)_2}$ ). Conditions:  $10^{-3}$  M in  $\text{CH}_2\text{Cl}_2$ , 0.1 M of  $\text{TBAPF}_6$ , scan rate =  $200 \text{ mV}\cdot\text{s}^{-1}$ , working electrode = Pt).

## EPR spectroscopy

X-Band EPR data were recorded using Elexsys ESP 500 and EMX Brüker EPR spectrometers. Spectra shown in the Figure 3 were recorded at room temperature using a microwave power of 2 mW, across a sweep width of 140 G, with a modulation amplitude of 0.2 G for  $[1^{\text{NMe}_2}]^{\bullet+}$  and 1 G for  $[1^{(\text{NMe}_2)_2}]^{\bullet+}$ . Spectra recorded with lower modulation amplitudes for both species did not revealed more lines or different patterns (data not shown). Landé factors were measured by comparison with a reference DPPH sample ( $g = 2.0036$ ). The numerical simulation of EPR spectra was done using EasySpin software (see ref. 15 in the main text).

To compute hfc's, we converged electronically both  $[1^{\text{NMe}_2}]^{\bullet+}$  and  $[1^{(\text{NMe}_2)_2}]^{\bullet+}$  radicals using TZ2P basis sets (frozen core option) and B3LYP<sup>8</sup> exchange-correlation potential.

| nucleus                                               | DFT computation | EPR simulation |
|-------------------------------------------------------|-----------------|----------------|
| H, C <sub>5</sub> -H                                  | 40.7            | 36             |
| 3H, CH <sub>3</sub> (pointing to C <sub>5</sub> side) | 13              | 12             |
| 3H, CH <sub>3</sub> (pointing to mesityl)             | 21.9            | 17.6           |
| 2N, N(CH <sub>3</sub> ) <sub>2</sub>                  | 20.2            | 15.8           |
| N, N <sub>1</sub> CN <sub>3</sub>                     | 5               | 3,7            |
| N, N <sub>1</sub> CN <sub>3</sub>                     | 3.9             | 3.7            |

**Table S1:** Hyperfine coupling constants (in MHz) obtained by DFT calculations and by numerical simulation of the EPR spectrum for the radical  $[1^{\text{NMe}_2}]^{\bullet+}$ .

---

<sup>8</sup> A. D. Becke, *J. Chem. Phys.* 1993, **98**, 1372-1377;

## UV/Visible spectroscopy

The UV-vis spectra were recorded at room temperature on a Perkin-Elmer Lambda 950 spectrometer using a 1 cm-path quartz cell with Teflon stopper.

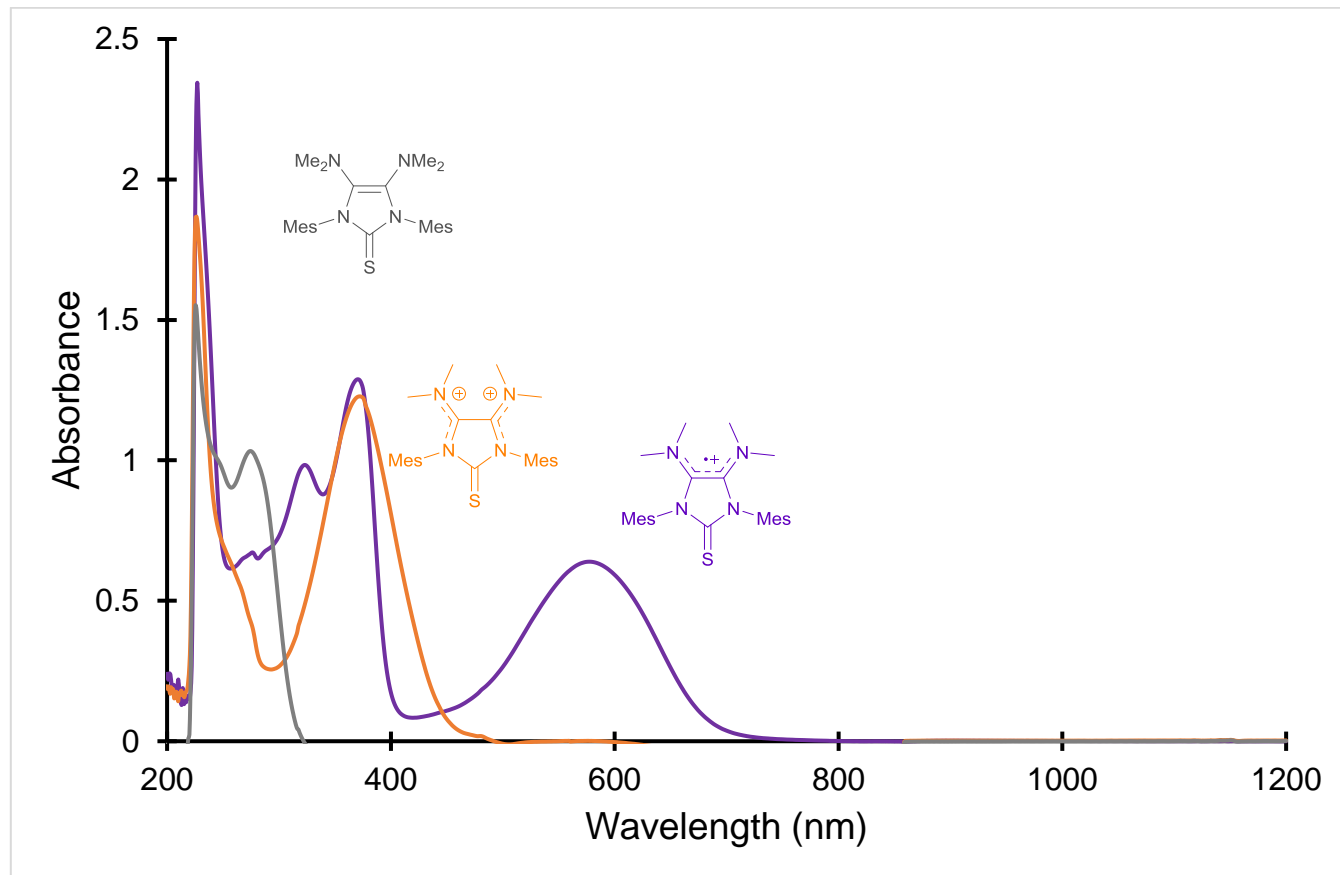

**Figure S3:** Normalized UV-visible spectra of compounds  $[1^{(NMe_2)_2}]$  (grey line),  $[1^{(NMe_2)_2}](SbF_6)$  (purple line) and  $[1^{(NMe_2)_2}](SbF_6)_2$  (orange line) (concentrations fixed at  $10^{-4}$  M) recorded in  $CH_2Cl_2$ .



## DFT calculations

All DFT calculations were performed with the ADF (Amsterdam Density Functional) code developed by E. J. Baerends and co-workers<sup>9</sup> using triple-zeta (TZ2P) basis sets (no frozen core).

Geometry optimizations of all species were performed relying on the Generalized Gradient Approximation (GGA) VBP exchange-correlation (XC) potential (VWN + BP: Vosko, Wilk & Nusair<sup>10</sup> + corrective terms by Becke<sup>11</sup> for the exchange, and Perdew<sup>12</sup> for the correlation) with ADF grid precision 6 throughout. The appropriate solvent environments (acetonitrile *versus* dichloromethane) have been modeled with the COSMO (COnductor-like Screening MOdel)<sup>13</sup> ADF module, representing the solvent as a dielectric continuum (ADF option: solv name), thus mimicking an average reaction field response of the environment.

Specific conditions for spectroscopic calculations (hfc's, g-tensors, NMR chemical shifts) are declined below.

---

<sup>9</sup> G. T. Velde and E. J. Baerends, *J. Comput. Phys.*, 1992, **99**, 84.

<sup>10</sup> S. H. Vosko, L. Wilk and M. Nusair, *Can. J. Phys.*, 1980, **58**, 1200.

<sup>11</sup> A. D. Becke, *Phys. Rev A*, 1988, **38**, 3098.

<sup>12</sup> J. P. Perdew, *Phys. Rev. B*, 1986, **33**, 8822.

<sup>13</sup> (a) A. Klamt and G. Schürmann, *J. Chem. Soc. Perkin Trans. 2*, 1993, 799; (b) A. Klamt, *J. Phys. Chem.*, 1995, **99**, 2224; (c) A. Klamt and V. Jona, *J. Chem. Phys.*, 1996, **105**, 9972.

**Table S2: Geometrical features concerning [IMes<sup>(NMe2)2</sup>]=S]**

Method: DFT (SCM-ADF code), VBP (GGA) exchange-correlation potential, TZ2P basis sets

| 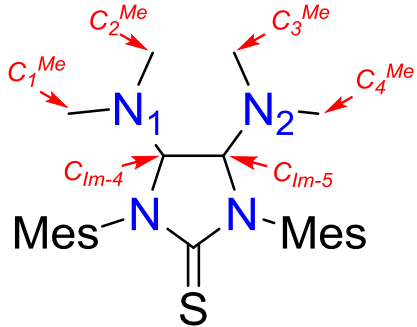<br>Compound | angles (deg)<br>C <sub>1</sub> <sup>Me</sup> -N <sub>1</sub> -C <sub>2</sub> <sup>Me</sup><br>C <sub>3</sub> <sup>Me</sup> -N <sub>2</sub> -C <sub>4</sub> <sup>Me</sup> | angles (deg)<br>C <sub>1</sub> <sup>Me</sup> -N <sub>1</sub> -C <sub>1m-4</sub><br>C <sub>2</sub> <sup>Me</sup> -N <sub>1</sub> -C <sub>1m-4</sub><br>C <sub>3</sub> <sup>Me</sup> -N <sub>2</sub> -C <sub>1m-5</sub><br>C <sub>4</sub> <sup>Me</sup> -N <sub>2</sub> -C <sub>1m-5</sub> | Average<br>sum<br>Σ <sub>N</sub> (deg) | bond lengths<br>(Å)<br>C <sub>1m-4</sub> -N <sub>1</sub><br>C <sub>1m-4</sub> -N <sub>1</sub> | bond lengths<br>(Å)<br>C <sub>1m-4</sub> -C <sub>1m-5</sub> | Dihedral angles (deg)<br>C <sub>1</sub> <sup>Me</sup> -N <sub>1</sub> -C <sub>1m-4</sub> -C <sub>1m-5</sub><br>C <sub>3</sub> <sup>Me</sup> -N <sub>2</sub> -C <sub>1m-5</sub> -C <sub>1m-4</sub><br>C <sub>2</sub> <sup>Me</sup> -N <sub>1</sub> -C <sub>1m-4</sub> -C <sub>1m-5</sub><br>C <sub>4</sub> <sup>Me</sup> -N <sub>2</sub> -C <sub>1m-5</sub> -C <sub>1m-4</sub> |
|-----------------------------------------------------------------------------------------------|--------------------------------------------------------------------------------------------------------------------------------------------------------------------------|------------------------------------------------------------------------------------------------------------------------------------------------------------------------------------------------------------------------------------------------------------------------------------------|----------------------------------------|-----------------------------------------------------------------------------------------------|-------------------------------------------------------------|-------------------------------------------------------------------------------------------------------------------------------------------------------------------------------------------------------------------------------------------------------------------------------------------------------------------------------------------------------------------------------|
| <b>1<sup>(NMe2)2</sup></b>                                                                    | 113.8                                                                                                                                                                    | 118.8                                                                                                                                                                                                                                                                                    | 350.0 <sup>(a)</sup>                   | 1.39                                                                                          | 1.38                                                        | -41.7                                                                                                                                                                                                                                                                                                                                                                         |
|                                                                                               |                                                                                                                                                                          | 117.5                                                                                                                                                                                                                                                                                    |                                        |                                                                                               |                                                             | -41.0                                                                                                                                                                                                                                                                                                                                                                         |
|                                                                                               | 113.9                                                                                                                                                                    | 118.6                                                                                                                                                                                                                                                                                    |                                        |                                                                                               |                                                             | 102.3                                                                                                                                                                                                                                                                                                                                                                         |
|                                                                                               |                                                                                                                                                                          | 117.5                                                                                                                                                                                                                                                                                    |                                        |                                                                                               |                                                             | 101.9                                                                                                                                                                                                                                                                                                                                                                         |
| <b>[1<sup>(NMe2)2</sup>]<sup>·+</sup></b>                                                     | 114.4                                                                                                                                                                    | 121.3                                                                                                                                                                                                                                                                                    | 359.6                                  | 1.35                                                                                          | 1.43                                                        | -37.6                                                                                                                                                                                                                                                                                                                                                                         |
|                                                                                               |                                                                                                                                                                          | 123.9                                                                                                                                                                                                                                                                                    |                                        |                                                                                               |                                                             | -37.5                                                                                                                                                                                                                                                                                                                                                                         |
|                                                                                               | 114.4                                                                                                                                                                    | 121.1                                                                                                                                                                                                                                                                                    |                                        |                                                                                               |                                                             | 150.6                                                                                                                                                                                                                                                                                                                                                                         |
|                                                                                               |                                                                                                                                                                          | 124.0                                                                                                                                                                                                                                                                                    |                                        |                                                                                               |                                                             | 150.9                                                                                                                                                                                                                                                                                                                                                                         |
| <b>[1<sup>(NMe2)2</sup>]<sup>2+</sup></b>                                                     | 112.6                                                                                                                                                                    | 122.7                                                                                                                                                                                                                                                                                    | 359.4                                  | 1.32                                                                                          | 1.50                                                        | -25.3                                                                                                                                                                                                                                                                                                                                                                         |
|                                                                                               |                                                                                                                                                                          | 124.1                                                                                                                                                                                                                                                                                    |                                        |                                                                                               |                                                             | -24.5                                                                                                                                                                                                                                                                                                                                                                         |
|                                                                                               | 112.7                                                                                                                                                                    | 122.8                                                                                                                                                                                                                                                                                    |                                        |                                                                                               |                                                             | 163.6                                                                                                                                                                                                                                                                                                                                                                         |
|                                                                                               |                                                                                                                                                                          | 123.9                                                                                                                                                                                                                                                                                    |                                        |                                                                                               |                                                             | 164.5                                                                                                                                                                                                                                                                                                                                                                         |

**(a)** Using neutral NMe<sub>3</sub> as a reference for pyramidalized nitrogen atom (Σ<sub>N</sub> = 334.2°), the two nitrogen atoms in neutral **1<sup>(NMe2)2</sup>** are 39% sp<sup>3</sup> hybridized (i.e. 1.0-(350.0-334.1)/(360.0-334.2)).

## Computation of the g-tensors

To compute g-tensors, we converged electronically both  $[1^{NMe_2}]^{*+}$  and  $[1^{(NMe_2)_2}]^{*+}$  radicals using the scalar relativistic approximation as a starting point for the separate EPR/NMR module (TZ2P basis sets and GGA exchange-correlation potential). This was performed taking into account the solvent (via the COSMO module, with parameter “solv” set to “dichloromethane”) as this was the determining factor. Other factors, such as larger basis sets (QZ4P), alternative XC potentials (SAOP or B3LYP), or full relativistic (i.e. spin-orbit) calculations, did not improve as much the calculations as solvation effects.

Experimentally, we measured:

for  $[1^{NMe_2}]^{*+}$ :  $g_1 = 2.0084$

for  $[1^{(NMe_2)_2}]^{*+}$ :  $g_2 = 2.0068$

Computationally:

for  $[1^{NMe_2}]^{*+}$ :  $g_1(\text{GGA}) = 2.0115$

for  $[1^{(NMe_2)_2}]^{*+}$ :  $g_2(\text{GGA}) = 2.0080$

(without solvent:  $g_1(\text{GGA}) = 2.0168$  and  $g_2(\text{GGA}) = 2.0120$ ).

Though slightly larger in magnitude, the computed values reproduce well the experimental trend ( $g_1 > g_2$ ), related to the fact that the spin population on the sulfur atom (i.e. the atom here with the largest spin-orbital coupling) is significantly larger in the  $[1^{NMe_2}]^{*+}$  species (0.316) than in  $[1^{(NMe_2)_2}]^{*+}$  species (0.227).

## TD-DFT calculations on the UV-Vis spectrum of $[1^{(NMe_2)_2}](SbF_6)$

The first 50 singlet-singlet transitions and corresponding oscillator strengths have been computed by TD-DFT calculations (GGA-VBP potential, *in vacuo*) for the previously geometry-optimized  $[1^{(NMe_2)_2}]^{*+}$  species for which, experimentally, three absorption lines have been measured above 300 nm: 323 nm and 369 nm (near UV) and 578 nm (visible).

Computationally, three transitions exhibit the largest oscillator strength, one at 313 nm ( $f = 0.067$  a.u.), the next one at 359 nm ( $f = 0.067$  a.u.) and the last one at 582 nm ( $f = 0.089$  a.u.). The spin  $\alpha$  HOMO-LUMO gap implicates the orbitals 114 (occupied) and 115 (empty), respectively (occupied 113 and empty 114 for spin  $\beta$ ). The orbital 114 is thus the SOMO (see Scheme below).

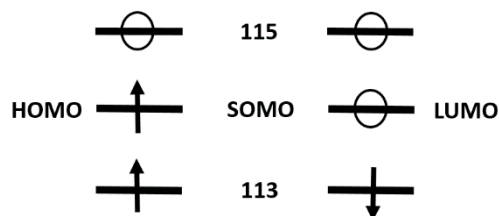

The main results are given in the following table.

| Exp.(nm)   | DFT        |              |                                                   |             |
|------------|------------|--------------|---------------------------------------------------|-------------|
|            | (nm)       | f (a.u.)     | Transition(s)                                     | weight (%)  |
| 323        | 313        | 0.067        | $103\beta \rightarrow 114\beta$                   | 39 %        |
|            |            |              | $114\alpha \rightarrow 120\alpha$                 | 36 %        |
| 369        | 359        | 0.067        | $114\alpha \rightarrow 115\alpha$                 | 76 %        |
| <b>578</b> | <b>582</b> | <b>0.089</b> | <b><math>109\beta \rightarrow 114\beta</math></b> | <b>78 %</b> |

**Table S3.** Experimental and computed transitions (nm), oscillator strengths f (a.u.) and description of the main orbitals involved (with weights in %) for compound  $[1^{(NMe_2)_2}](SbF_6)$ .

The orbitals involved in the transitions are represented in figure S4.

The transition at 582 nm is made from the following transition:  $109\beta \rightarrow LUMO\ 114\beta$  (weight = 78 %).

The intermediary transition computed at 359 nm corresponds to the (spin  $\alpha$ ) HOMO  $\rightarrow$  LUMO gap ( $114\alpha \rightarrow 115\alpha$ ) of weight 76 %. This  $114\alpha$  orbital becoming empty in the di-oxidized (2+) species, the fact of observing in the latter case a line at 372 nm (close to 359 nm for the 1+ species) is coincidental.

As for the transition computed at 313 nm (measured at 323 nm), it is made of two major contributions:  $103\beta \rightarrow 114\beta$  (39 %) and  $114\alpha \rightarrow 120\alpha$  (36 %).

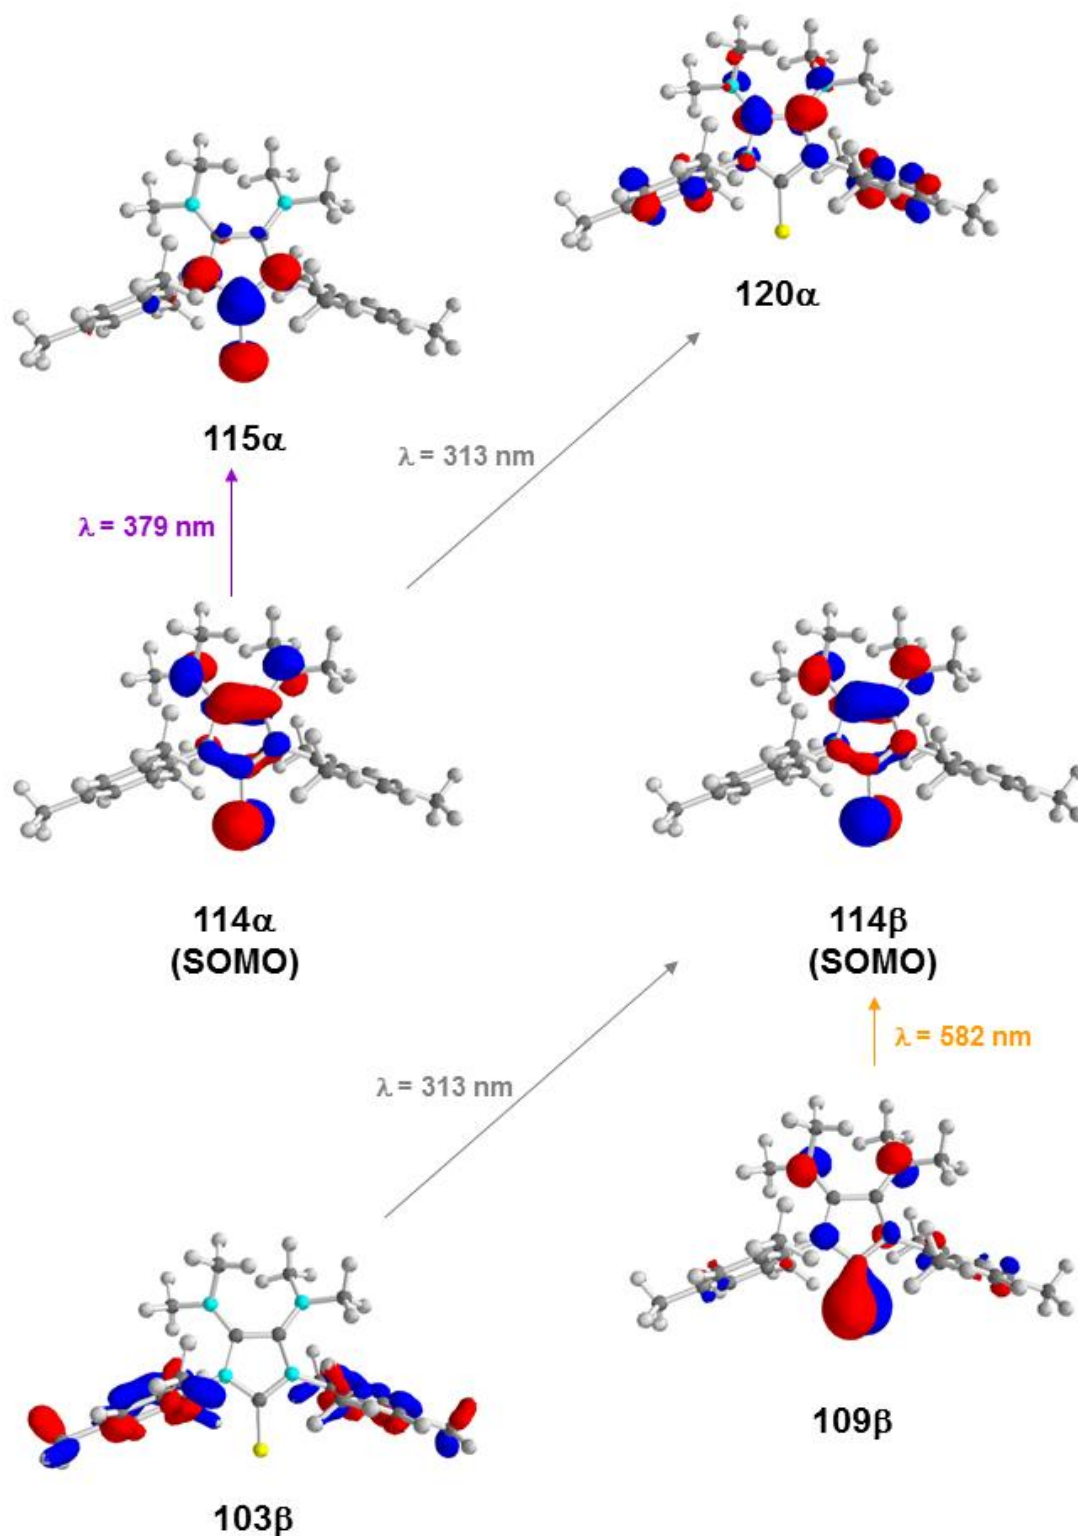

**Figure S4.** Depiction of the orbitals involved in the major transitions corresponding to the absorption UV-Vis spectrum of  $[1^{(\text{NMe}_2)_2}]^{+}$ . Iso-density value: 0.05 a.u.

## Computation of $^{13}\text{C}$ NMR screening constants for dicationic $[\mathbf{1}^{(\text{NMe}_2)_2}]^{2+}$

For NMR computations, geometry optimizations of all species were performed in acetonitrile ( $\epsilon = 37.5$ ). NMR screening constants have been computed using the SAOP (Statistical Average of Orbital Potentials)<sup>14</sup> exchange-correlation potential particularly suitable for modeling NMR quantities. In addition to using TZ2P basis sets (see above), attempts to better the computation of NMR screening constants using quadrupole-zeta (QZ4P) basis sets did not significantly improve the results and are therefore not presented here.

## Results

### # ADF labels

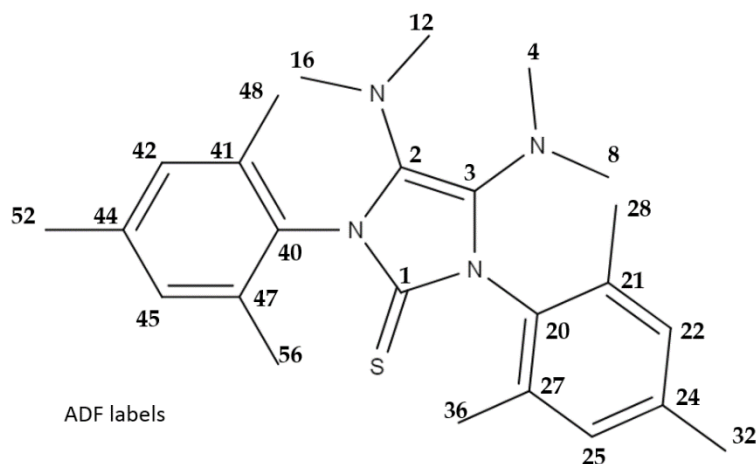

| #  | Exp ( $\delta$ ) | DFT ( $\sigma$ ) | average | $\delta$ via Eq.1 | $\Delta\delta^2$ | $\delta$ via Eq.2 | $\Delta\delta^2$ |
|----|------------------|------------------|---------|-------------------|------------------|-------------------|------------------|
| 1  | 170.7            | 17.2             | 17.2    | 163.74            | 48.47            | 162.97            | 59.68            |
| 2  | 155.2            | 26.5             | 26.4    | 154.60            | 0.35             | 154.00            | 1.44             |
| 3  | 155.2            | 26.3             | 26.4    | 154.80            | 0.16             | 154.00            | 1.44             |
| 4  | 51               | 132.6            | 132.6   | 50.40             | 0.36             | 50.43             | 0.33             |
| 8  | 48.1             | 135.8            | 135.8   | 47.26             | 0.70             | 47.30             | 0.63             |
| 12 | 51               | 132.7            | 132.7   | 50.31             | 0.48             | 50.33             | 0.45             |
| 16 | 48.1             | 135.9            | 135.9   | 47.16             | 0.88             | 47.21             | 0.80             |
| 20 | 129.8            | 50.5             | 50.5    | 131.03            | 1.52             | 130.50            | 0.49             |
| 21 | 137.3            | 42.9             | 43.1    | 138.50            | 1.43             | 137.71            | 0.17             |
| 22 | 131.3            | 50.9             | 50.7    | 130.64            | 0.43             | 130.30            | 1.00             |
| 24 | 144.6            | 34               | 34      | 147.24            | 6.96             | 146.59            | 3.96             |
| 25 | 131.3            | 50.6             | 50.7    | 130.94            | 0.13             | 130.30            | 1.00             |
| 27 | 137.3            | 43.3             | 43.1    | 138.11            | 0.65             | 137.71            | 0.17             |
| 28 | 18.5             | 165.2            | 165     | 18.39             | 0.01             | 18.83             | 0.11             |
| 32 | 21.2             | 162              | 162     | 21.53             | 0.11             | 21.75             | 0.30             |
| 36 | 18.5             | 164.7            | 165     | 18.88             | 0.14             | 18.83             | 0.11             |
| 40 | 129.8            | 50.5             | 50.5    | 131.03            | 1.52             | 130.50            | 0.49             |
| 41 | 137.3            | 43.3             | 43.1    | 138.11            | 0.65             | 137.71            | 0.17             |

<sup>14</sup> (a) O. V. Gritsenko, P. R. T. Schipper, E. J. Baerends, *Chem. Phys. Lett.* **1999**, 302, 199; (b) P. R. T. Schipper, O. V. Gritsenko, S. J. A. van Gisbergen, E. J. Baerends, *J. Chem. Phys.* **2000**, 112, 1344.

|    |       |       |      |        |      |        |      |
|----|-------|-------|------|--------|------|--------|------|
| 42 | 131.3 | 50.5  | 50.7 | 131.03 | 0.07 | 130.30 | 1.00 |
| 44 | 144.6 | 34.1  | 34   | 147.14 | 6.45 | 146.59 | 3.96 |
| 45 | 131.3 | 50.9  | 50.7 | 130.64 | 0.43 | 130.30 | 1.00 |
| 47 | 137.3 | 43    | 43.1 | 138.40 | 1.21 | 137.71 | 0.17 |
| 48 | 18.5  | 164.7 | 165  | 18.88  | 0.14 | 18.83  | 0.11 |
| 52 | 21.2  | 162.1 | 162  | 21.43  | 0.05 | 21.75  | 0.30 |
| 56 | 18.5  | 165.2 | 165  | 18.39  | 0.01 | 18.83  | 0.11 |

**Ideally:**  $\delta(\text{exp}) = -1.0 \cdot \sigma(\text{DFT}) + \sigma(^{13}\text{C\_TMS})$

Eq.1:  $\delta(\text{exp}) = -0.9821 \cdot \sigma(\text{DFT}) + 180.63$  (includes all 25 carbon nuclei)

→ RMS = 1.7 ppm (1.1 ppm when excluding the first N<sub>2</sub>C=S carbon: **blue point**)

Eq.2:  $\delta(\text{exp}) = -0.9753 \cdot \sigma(\text{DFT}) + 179.75$  (includes all - but the first N<sub>2</sub>C=S - carbon nuclei)

→ RMS = 0.9 ppm

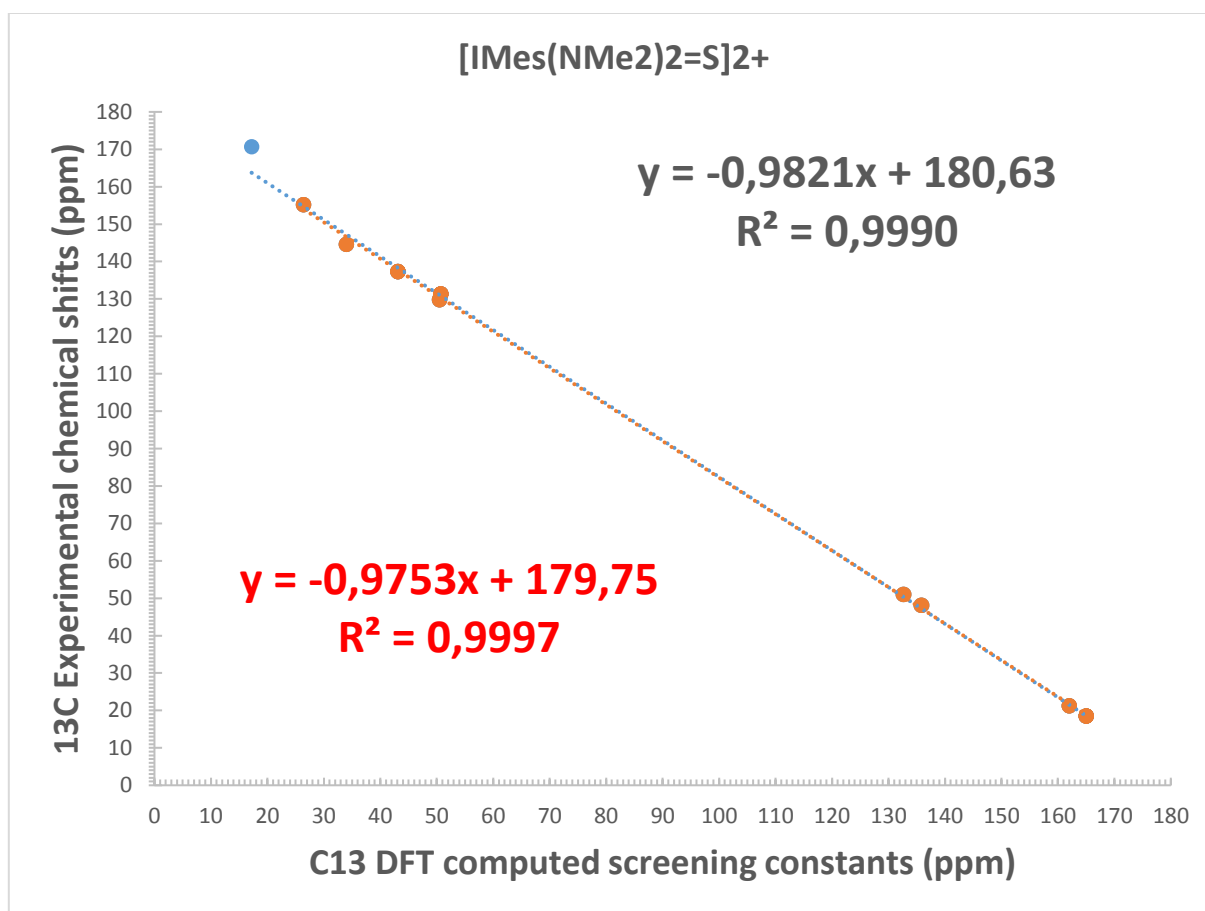

Method: DFT (SCM-ADF code), based on previously optimized geometries (VBP (gga) exchange-correlation potential, TZ2P basis sets), restart with NMR-dedicated SAOP exchange-correlation potential, with TZ2P basis sets.

Using a more extended/flexible basis set (QZ4P) only marginally improved the above results which are therefore not presented. Notice that DFT computation of NMR screening constants are formally

performed at 0 K and do not take into account any thermal effects on geometrical structures that may arise for species spectroscopically measured at room temperature.

Technical notes:

→ TZ2P: triple zeta + 2 polarization functions

QZ4P: quadruple zeta + 4 polarization functions

→ “triple zeta” means that each atomic basis (radial part) is a linear combination of 3 exponential decays (4 for “quadruple zeta”).

Additional “polarization functions” to better describe local (i.e. around nuclei) electronic density anisotropies (i.e. beyond first order spherical).

### DFT geometry-optimized coordinates

[1<sup>NMe2</sup>]<sup>•+</sup>

|   |           |           |           |
|---|-----------|-----------|-----------|
| C | 4.022543  | 3.120597  | 12.042079 |
| C | 4.775087  | 1.262600  | 13.139191 |
| C | 3.394603  | 1.428181  | 13.397704 |
| C | 4.921254  | -0.667351 | 14.588480 |
| H | 5.725483  | -1.128306 | 15.168171 |
| H | 4.373271  | -1.452987 | 14.050622 |
| H | 4.248485  | -0.147963 | 15.276095 |
| C | 6.891280  | -0.080337 | 13.217305 |
| H | 7.254427  | 0.585022  | 12.434419 |
| H | 6.877689  | -1.113472 | 12.844914 |
| H | 7.561787  | -0.031543 | 14.084965 |
| C | 6.448809  | 2.648289  | 11.778240 |
| C | 7.312273  | 3.412279  | 12.581204 |
| C | 8.564972  | 3.740696  | 12.049413 |
| H | 9.248445  | 4.336089  | 12.656518 |
| C | 8.956321  | 3.338118  | 10.765893 |
| C | 8.053528  | 2.588996  | 9.998833  |
| H | 8.335733  | 2.275017  | 8.992827  |
| C | 6.789359  | 2.230748  | 10.479963 |
| C | 6.916907  | 3.877033  | 13.959122 |
| H | 7.717294  | 4.475027  | 14.406669 |
| H | 6.712883  | 3.034167  | 14.635557 |
| H | 6.009425  | 4.496951  | 13.926910 |
| C | 10.321491 | 3.686474  | 10.229269 |
| H | 11.040543 | 2.883618  | 10.451298 |
| H | 10.706887 | 4.606008  | 10.685122 |
| H | 10.302017 | 3.813073  | 9.140138  |
| C | 5.841780  | 1.427234  | 9.628402  |
| H | 4.934773  | 2.002747  | 9.393536  |



|   |           |          |           |
|---|-----------|----------|-----------|
| H | 5.521003  | 0.503375 | 10.130570 |
| H | 6.317558  | 1.147233 | 8.683087  |
| C | 1.600278  | 3.006669 | 12.763053 |
| C | 1.210699  | 3.866880 | 13.801903 |
| C | -0.130754 | 4.269723 | 13.831167 |
| H | -0.454187 | 4.942041 | 14.626990 |
| C | -1.058221 | 3.836492 | 12.875919 |
| C | -0.615962 | 2.980279 | 11.857813 |
| H | -1.322223 | 2.635869 | 11.100807 |
| C | 0.711363  | 2.545081 | 11.777093 |
| C | 2.183236  | 4.352626 | 14.845783 |
| H | 2.616532  | 3.520541 | 15.419049 |
| H | 1.682334  | 5.019785 | 15.554441 |
| H | 3.015958  | 4.906756 | 14.389815 |
| C | -2.504029 | 4.257869 | 12.951882 |
| H | -3.119802 | 3.449006 | 13.372656 |
| H | -2.906182 | 4.483673 | 11.956275 |
| H | -2.631527 | 5.139032 | 13.590735 |
| C | 1.154177  | 1.620797 | 10.672202 |
| H | 0.308335  | 1.362773 | 10.026909 |
| H | 1.573362  | 0.684532 | 11.067490 |
| H | 1.927125  | 2.088478 | 10.045775 |
| S | 3.957144  | 4.496168 | 11.127827 |
| N | 5.137526  | 2.309703 | 12.297401 |
| N | 2.969348  | 2.531647 | 12.737260 |
| N | 5.534380  | 0.276832 | 13.640428 |
| H | 2.721099  | 0.812815 | 13.977338 |

**1**(NMe<sub>2</sub>)<sub>2</sub>

|   |          |           |           |
|---|----------|-----------|-----------|
| C | 3.964882 | 3.139324  | 12.091466 |
| C | 4.745413 | 1.235881  | 13.108920 |
| C | 3.384467 | 1.286937  | 13.315997 |
| C | 5.676077 | 0.012083  | 15.005257 |
| H | 6.683757 | -0.273280 | 15.339797 |
| H | 5.004381 | -0.843313 | 15.202048 |
| H | 5.340186 | 0.864845  | 15.605928 |
| C | 6.255445 | -0.664616 | 12.719103 |
| H | 6.430678 | -0.272672 | 11.711485 |
| H | 5.571096 | -1.530571 | 12.648711 |
| H | 7.215775 | -1.018198 | 13.117528 |
| C | 2.631446 | -1.025949 | 13.535180 |
| H | 2.919944 | -1.126473 | 12.482803 |
| H | 1.663944 | -1.527874 | 13.679747 |
| H | 3.377479 | -1.553589 | 14.156918 |
| C | 2.017845 | 0.619411  | 15.248295 |
| H | 1.091168 | 0.052839  | 15.410998 |
| H | 1.798027 | 1.681374  | 15.400992 |
| H | 2.756086 | 0.298473  | 16.006792 |
| C | 6.396167 | 2.681058  | 11.832857 |
| C | 7.303341 | 3.334528  | 12.684565 |

|   |           |          |           |
|---|-----------|----------|-----------|
| C | 8.583843  | 3.616152 | 12.190337 |
| H | 9.293125  | 4.131565 | 12.840710 |
| C | 8.971839  | 3.265647 | 10.890250 |
| C | 8.033554  | 2.625719 | 10.069968 |
| H | 8.308674  | 2.358128 | 9.048007  |
| C | 6.740030  | 2.323866 | 10.516780 |
| C | 6.914167  | 3.744430 | 14.080897 |
| H | 7.725188  | 4.301789 | 14.562457 |
| H | 6.684913  | 2.866348 | 14.700461 |
| H | 6.016123  | 4.378350 | 14.073316 |
| C | 10.368123 | 3.552899 | 10.393911 |
| H | 11.040724 | 2.709219 | 10.611144 |
| H | 10.791566 | 4.439223 | 10.881858 |
| H | 10.383193 | 3.708522 | 9.308293  |
| C | 5.746971  | 1.670018 | 9.590414  |
| H | 4.910673  | 2.353095 | 9.378782  |
| H | 5.311709  | 0.760358 | 10.026740 |
| H | 6.221482  | 1.399538 | 8.640834  |
| C | 1.567302  | 2.957869 | 12.727670 |
| C | 1.190551  | 3.917965 | 13.682141 |
| C | -0.142831 | 4.352548 | 13.687460 |
| H | -0.445667 | 5.100264 | 14.422849 |
| C | -1.087271 | 3.860970 | 12.778379 |
| C | -0.666403 | 2.913491 | 11.834266 |
| H | -1.381556 | 2.528737 | 11.104515 |
| C | 0.653041  | 2.446866 | 11.788893 |
| C | 2.185727  | 4.504560 | 14.650174 |
| H | 2.760367  | 3.729437 | 15.175036 |
| H | 1.680803  | 5.123831 | 15.399575 |
| H | 2.915067  | 5.132603 | 14.116380 |
| C | -2.523170 | 4.324534 | 12.820035 |
| H | -3.161322 | 3.577702 | 13.315858 |
| H | -2.925565 | 4.469006 | 11.809178 |
| H | -2.624118 | 5.265177 | 13.373951 |
| C | 1.075045  | 1.442905 | 10.748045 |
| H | 0.251107  | 1.228564 | 10.058462 |
| H | 1.387063  | 0.498370 | 11.215062 |
| H | 1.928913  | 1.811929 | 10.162475 |
| S | 3.887481  | 4.600444 | 11.225273 |
| N | 5.077438  | 2.371495 | 12.321105 |
| N | 2.927833  | 2.487228 | 12.706385 |
| N | 5.740906  | 0.393774 | 13.593891 |
| N | 2.481396  | 0.389235 | 13.876394 |

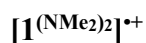

|   |          |           |           |
|---|----------|-----------|-----------|
| C | 3.968848 | 3.072554  | 12.131223 |
| C | 4.761220 | 1.153171  | 13.083976 |
| C | 3.373480 | 1.270700  | 13.403364 |
| C | 5.572511 | -0.296402 | 14.897768 |
| H | 6.517401 | -0.050581 | 15.403569 |

|   |           |           |           |
|---|-----------|-----------|-----------|
| H | 5.453702  | -1.387289 | 14.897840 |
| H | 4.750694  | 0.166356  | 15.448489 |
| C | 6.800365  | -0.236123 | 12.759407 |
| H | 6.656099  | -0.061422 | 11.691186 |
| H | 6.905540  | -1.315855 | 12.927707 |
| H | 7.721769  | 0.261531  | 13.094852 |
| C | 2.759414  | -1.068669 | 13.847864 |
| H | 3.567505  | -1.270820 | 13.141489 |
| H | 1.822365  | -1.469035 | 13.434345 |
| H | 2.961100  | -1.575495 | 14.799927 |
| C | 1.437538  | 0.742202  | 14.875681 |
| H | 0.494545  | 0.606062  | 14.326636 |
| H | 1.516179  | 1.775671  | 15.219441 |
| H | 1.430468  | 0.080252  | 15.751554 |
| C | 6.386479  | 2.607200  | 11.779093 |
| C | 7.271090  | 3.260306  | 12.654456 |
| C | 8.531353  | 3.613618  | 12.156659 |
| H | 9.228022  | 4.126914  | 12.821361 |
| C | 8.912620  | 3.341613  | 10.836604 |
| C | 7.988798  | 2.705653  | 9.996546  |
| H | 8.260287  | 2.498552  | 8.960179  |
| C | 6.716313  | 2.329481  | 10.441677 |
| C | 6.888163  | 3.602243  | 14.071710 |
| H | 7.680566  | 4.184838  | 14.552859 |
| H | 6.720533  | 2.702844  | 14.681724 |
| H | 5.963669  | 4.196239  | 14.104199 |
| C | 10.287035 | 3.710577  | 10.337194 |
| H | 10.993949 | 2.883324  | 10.501253 |
| H | 10.682463 | 4.586113  | 10.865850 |
| H | 10.278275 | 3.922525  | 9.261398  |
| C | 5.742244  | 1.667140  | 9.502755  |
| H | 4.883147  | 2.325003  | 9.305822  |
| H | 5.342175  | 0.728925  | 9.912615  |
| H | 6.222640  | 1.439007  | 8.545710  |
| C | 1.580685  | 2.974284  | 12.818639 |
| C | 1.210715  | 3.992505  | 13.711849 |
| C | -0.108148 | 4.460333  | 13.651812 |
| H | -0.412235 | 5.251782  | 14.338441 |
| C | -1.037352 | 3.948502  | 12.738013 |
| C | -0.616132 | 2.944941  | 11.854623 |
| H | -1.318744 | 2.544948  | 11.121649 |
| C | 0.689165  | 2.441043  | 11.870397 |
| C | 2.187845  | 4.583894  | 14.693793 |
| H | 2.675360  | 3.815071  | 15.309974 |
| H | 1.683075  | 5.284736  | 15.366607 |
| H | 2.985750  | 5.128633  | 14.168208 |
| C | -2.457692 | 4.454705  | 12.706302 |
| H | -3.141079 | 3.725600  | 13.166125 |
| H | -2.801640 | 4.609792  | 11.675569 |
| H | -2.558989 | 5.398424  | 13.253955 |
| C | 1.111704  | 1.385877  | 10.880224 |

|   |          |          |           |
|---|----------|----------|-----------|
| H | 0.292173 | 1.155687 | 10.191644 |
| H | 1.403456 | 0.448306 | 11.374867 |
| H | 1.971578 | 1.721139 | 10.282626 |
| S | 3.893505 | 4.495970 | 11.280050 |
| N | 5.073104 | 2.236739 | 12.267204 |
| N | 2.940378 | 2.473853 | 12.852505 |
| N | 5.633732 | 0.216071 | 13.522888 |
| N | 2.596741 | 0.375473 | 14.056764 |

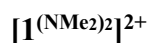

|   |           |           |           |
|---|-----------|-----------|-----------|
| C | 3.973543  | 3.029667  | 12.164502 |
| C | 4.804938  | 1.140581  | 13.130269 |
| C | 3.331913  | 1.219915  | 13.391384 |
| C | 5.428084  | -0.326177 | 15.000943 |
| H | 6.296307  | -0.066175 | 15.618045 |
| H | 5.385598  | -1.414245 | 14.896870 |
| H | 4.527407  | 0.063729  | 15.474324 |
| C | 7.021227  | 0.044581  | 13.165862 |
| H | 7.059656  | 0.187202  | 12.086326 |
| H | 7.246933  | -0.997880 | 13.410900 |
| H | 7.748157  | 0.693986  | 13.668685 |
| C | 2.899274  | -1.165637 | 13.793832 |
| H | 3.784387  | -1.326754 | 13.178673 |
| H | 2.038107  | -1.641571 | 13.309667 |
| H | 3.022478  | -1.598253 | 14.790859 |
| C | 1.216927  | 0.501277  | 14.453072 |
| H | 0.453604  | 0.293895  | 13.692968 |
| H | 1.118119  | 1.518836  | 14.829462 |
| H | 1.100221  | -0.211313 | 15.276066 |
| C | 6.391198  | 2.578092  | 11.759732 |
| C | 7.240174  | 3.356470  | 12.563464 |
| C | 8.467571  | 3.735195  | 12.008023 |
| H | 9.145720  | 4.339676  | 12.611615 |
| C | 8.842221  | 3.368878  | 10.708305 |
| C | 7.946974  | 2.606883  | 9.944773  |
| H | 8.216593  | 2.320610  | 8.927471  |
| C | 6.706228  | 2.197977  | 10.444905 |
| C | 6.860968  | 3.789724  | 13.955772 |
| H | 7.664577  | 4.381189  | 14.404846 |
| H | 6.671685  | 2.936594  | 14.623484 |
| H | 5.954324  | 4.412017  | 13.950826 |
| C | 10.184058 | 3.768520  | 10.151486 |
| H | 10.936479 | 2.996755  | 10.372955 |
| H | 10.537995 | 4.705761  | 10.596352 |
| H | 10.146113 | 3.883307  | 9.061930  |
| C | 5.761579  | 1.385491  | 9.598933  |
| H | 4.833569  | 1.938397  | 9.393868  |
| H | 5.479328  | 0.439807  | 10.083715 |
| H | 6.222947  | 1.139467  | 8.637786  |
| C | 1.579252  | 2.979847  | 12.857690 |

|   |           |          |           |
|---|-----------|----------|-----------|
| C | 1.228350  | 3.934125 | 13.825242 |
| C | -0.065804 | 4.463315 | 13.756441 |
| H | -0.365002 | 5.202029 | 14.500723 |
| C | -0.977109 | 4.073222 | 12.766684 |
| C | -0.565985 | 3.129413 | 11.814418 |
| H | -1.257117 | 2.821633 | 11.028625 |
| C | 0.713537  | 2.565335 | 11.830938 |
| C | 2.188093  | 4.377770 | 14.897583 |
| H | 2.571898  | 3.532382 | 15.486544 |
| H | 1.696507  | 5.067794 | 15.589937 |
| H | 3.055517  | 4.897308 | 14.465554 |
| C | -2.372250 | 4.641475 | 12.729831 |
| H | -3.097986 | 3.907016 | 13.109099 |
| H | -2.673399 | 4.888004 | 11.703836 |
| H | -2.454246 | 5.542471 | 13.347586 |
| C | 1.129870  | 1.574616 | 10.775044 |
| H | 0.302002  | 1.378928 | 10.086904 |
| H | 1.434628  | 0.608414 | 11.202622 |
| H | 1.973975  | 1.952875 | 10.180085 |
| S | 3.900660  | 4.422765 | 11.336125 |
| N | 5.094355  | 2.179249 | 12.291851 |
| N | 2.927584  | 2.428211 | 12.900406 |
| N | 5.662258  | 0.302966 | 13.685567 |
| N | 2.566321  | 0.269455 | 13.897831 |

# NMR Spectra

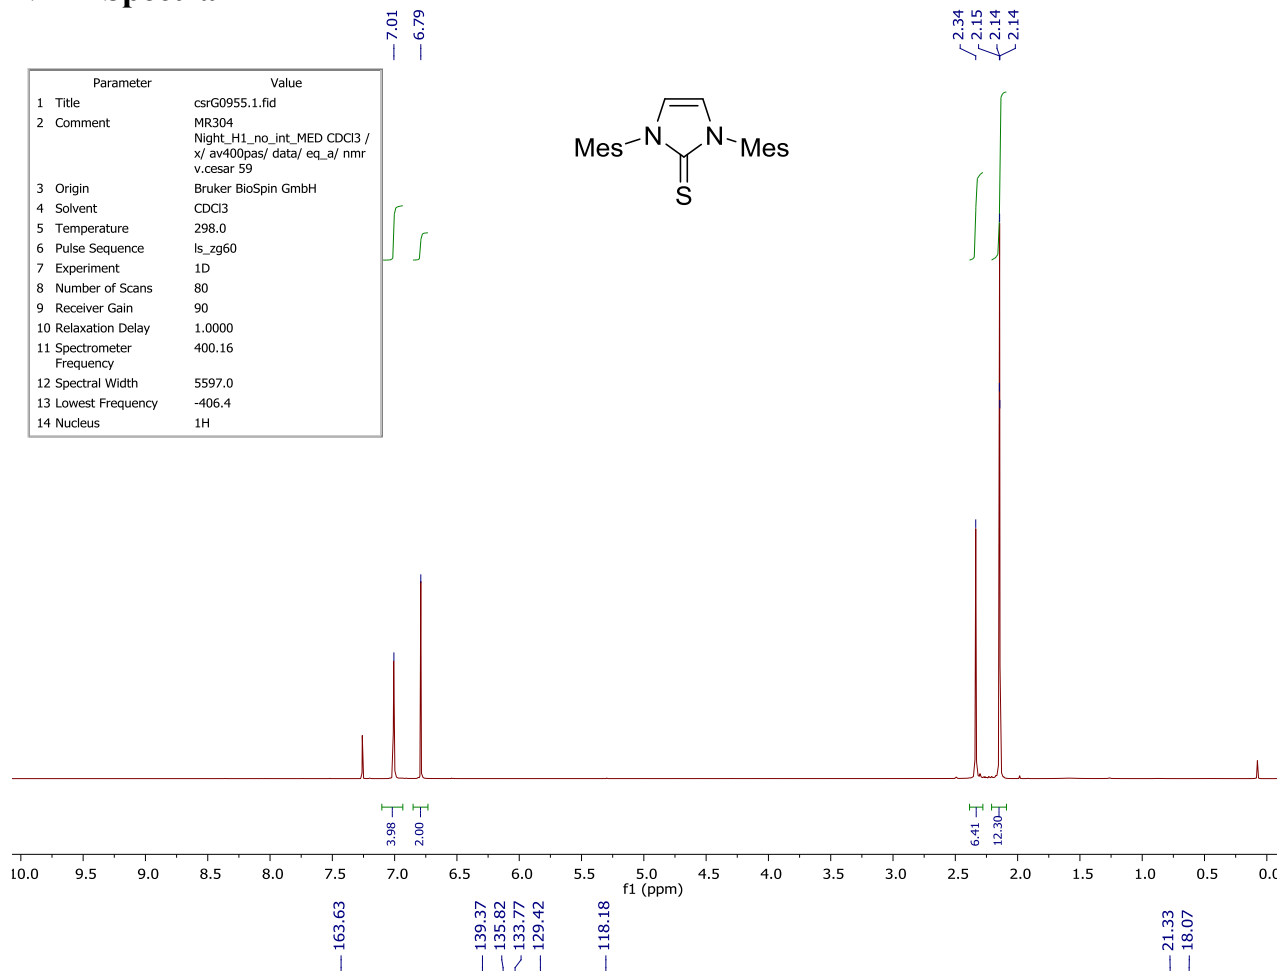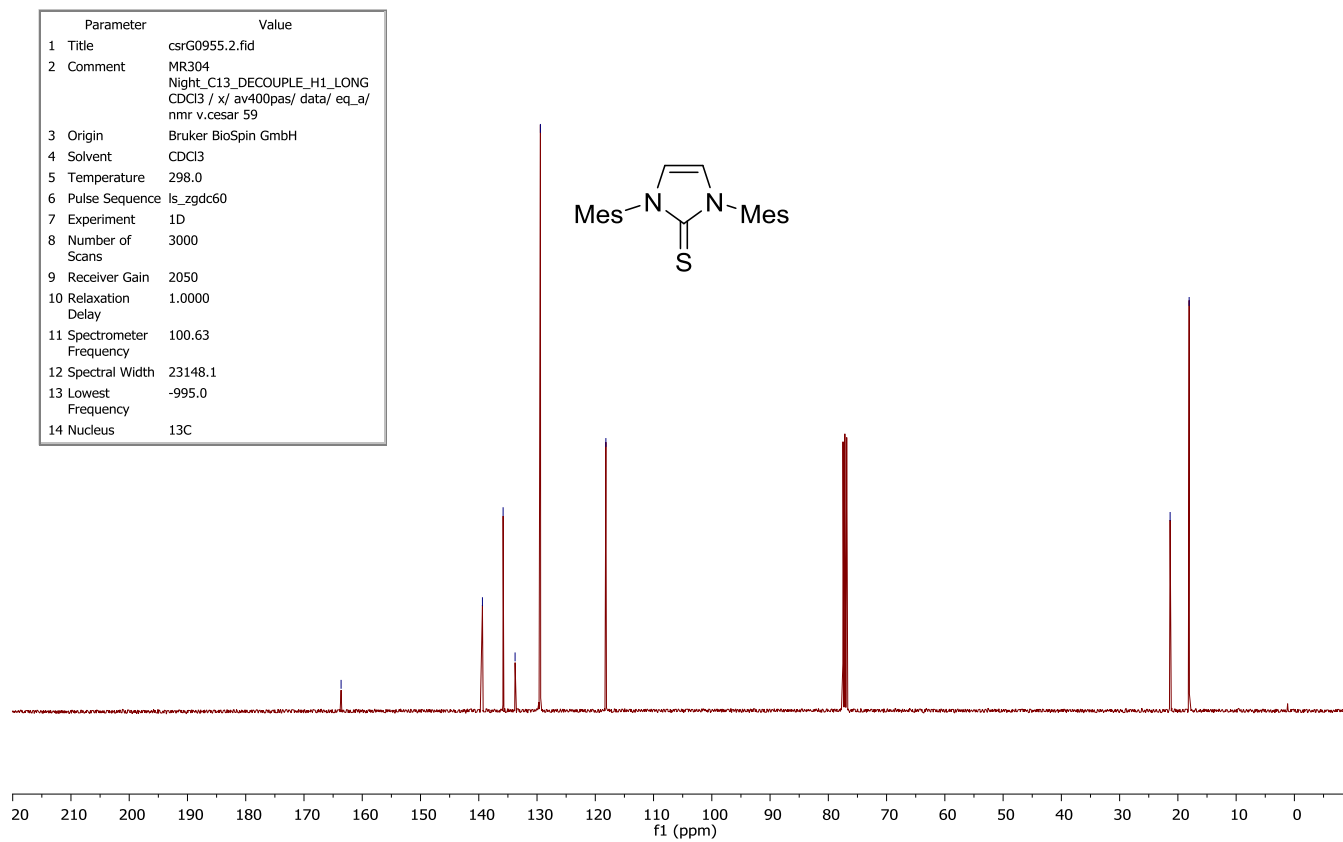

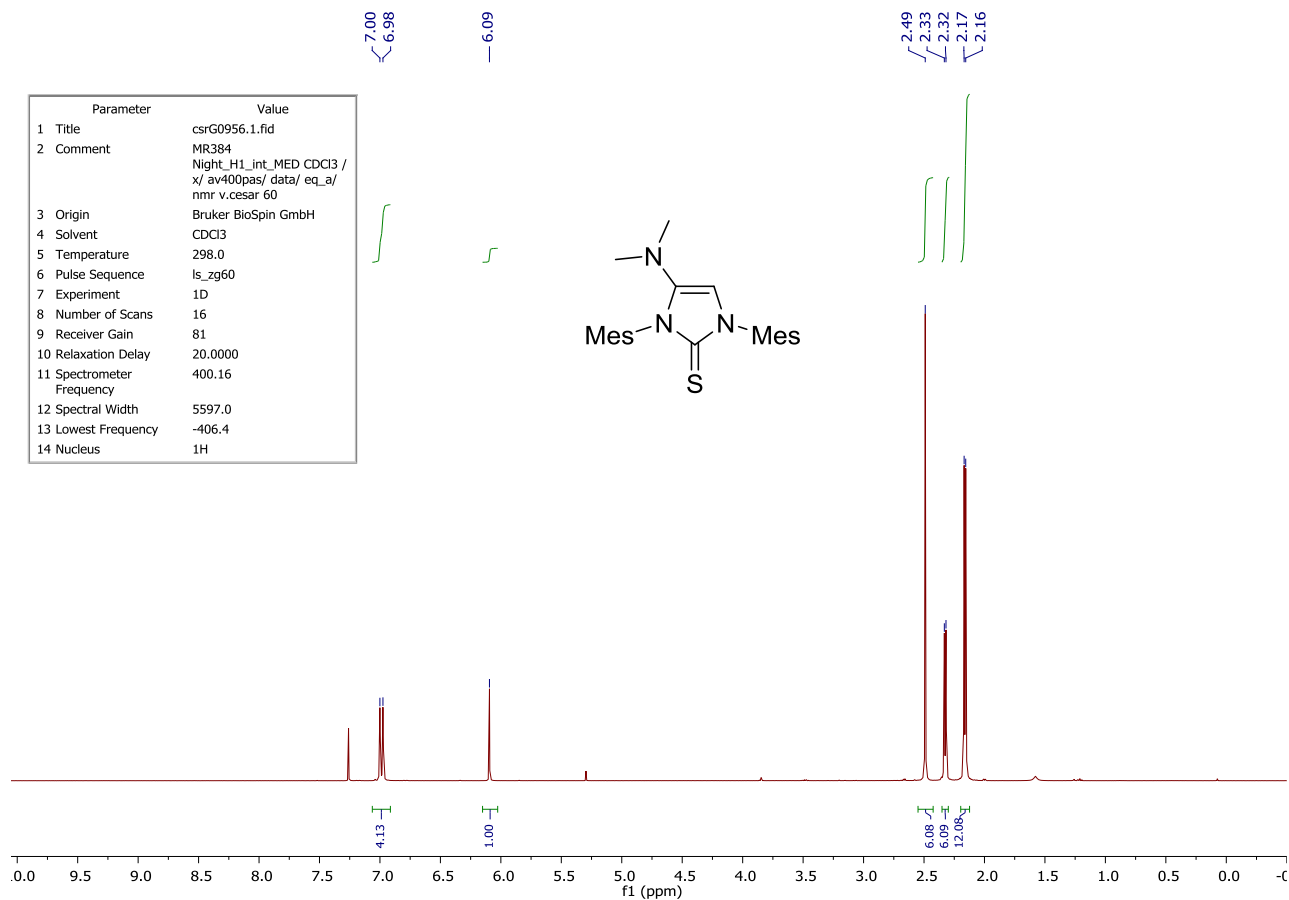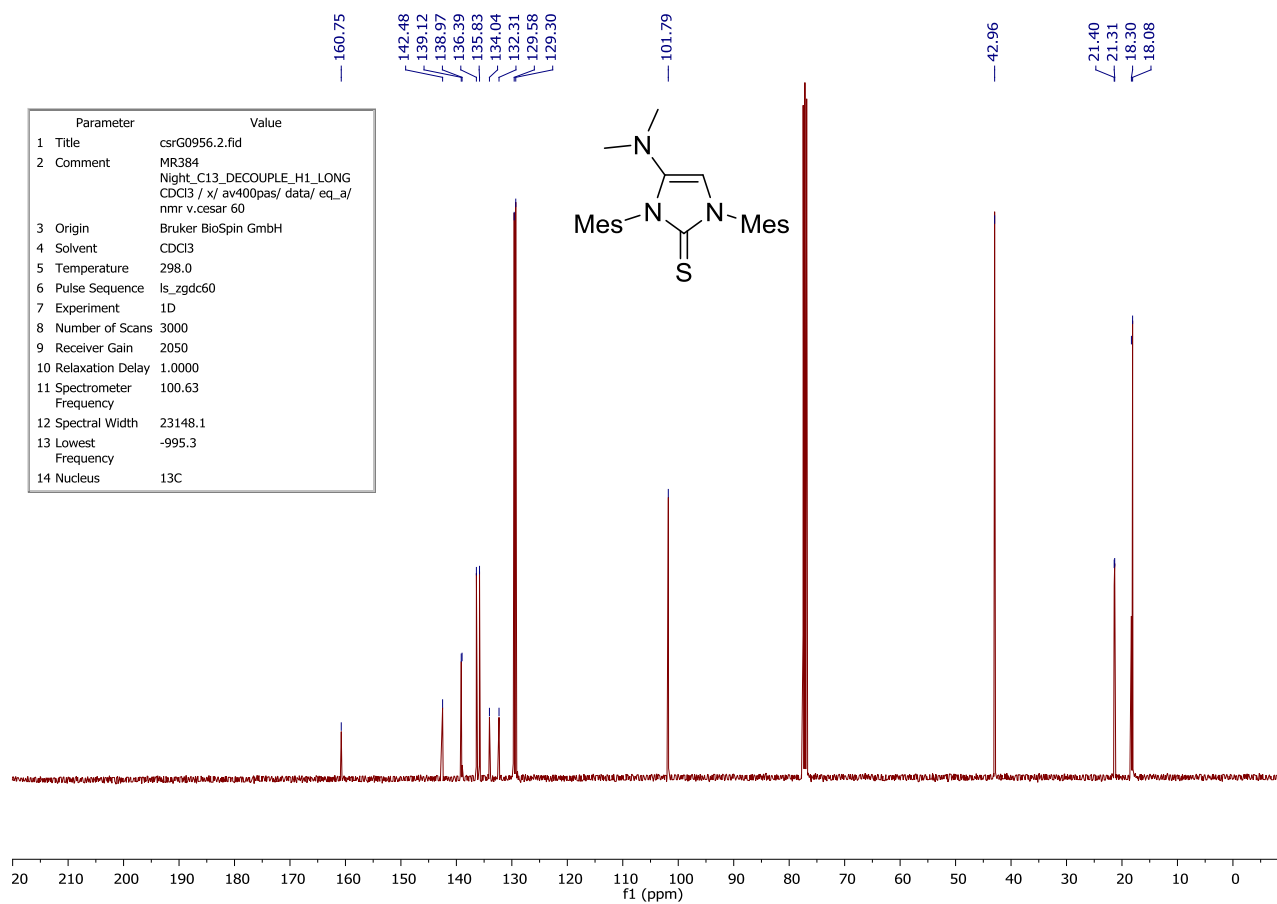

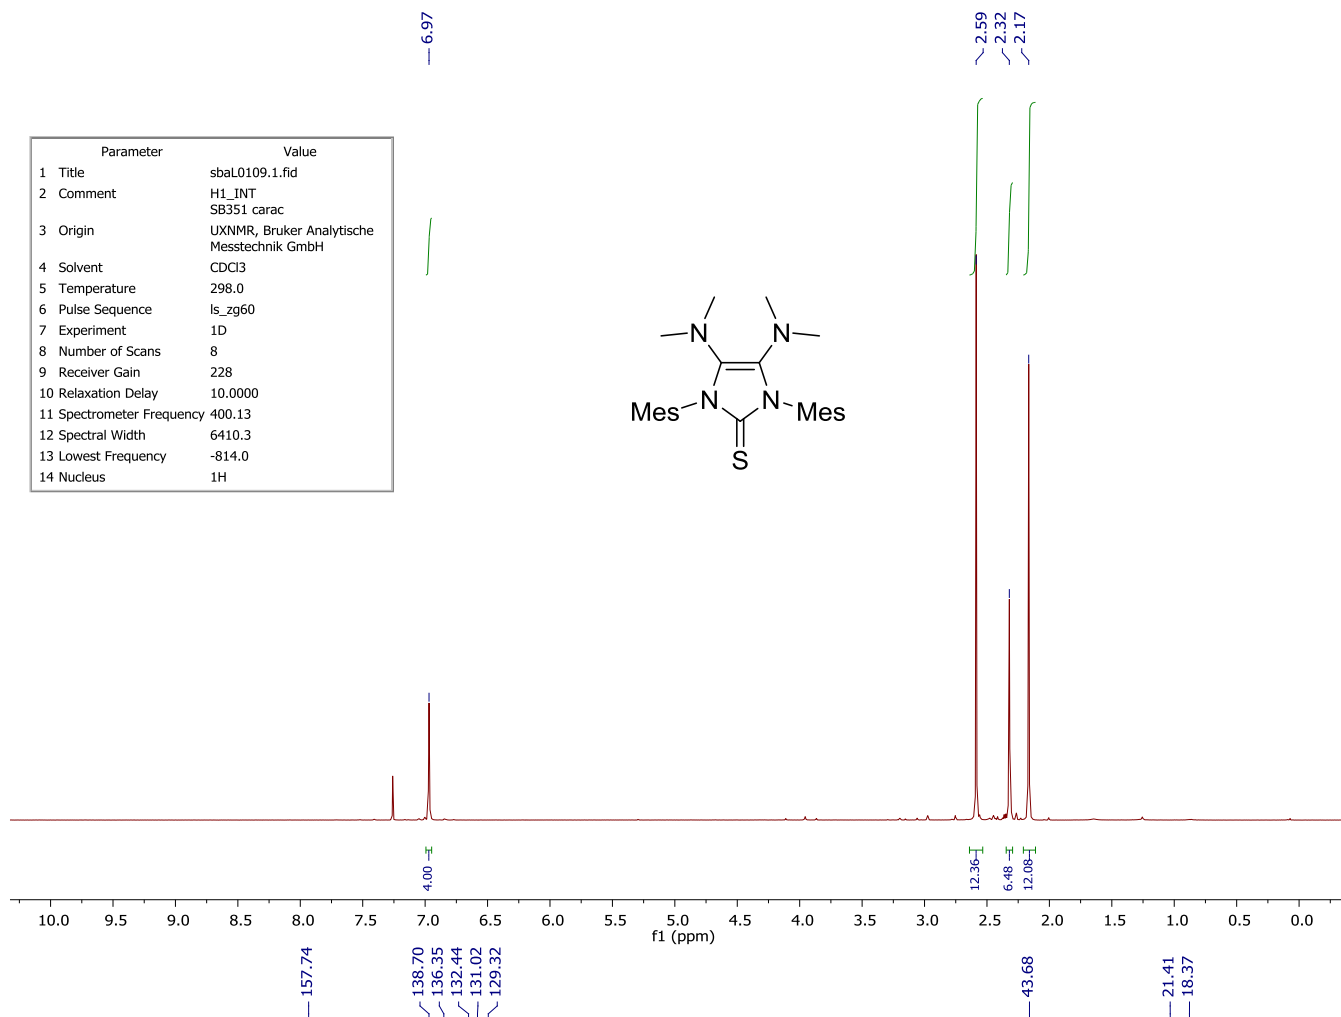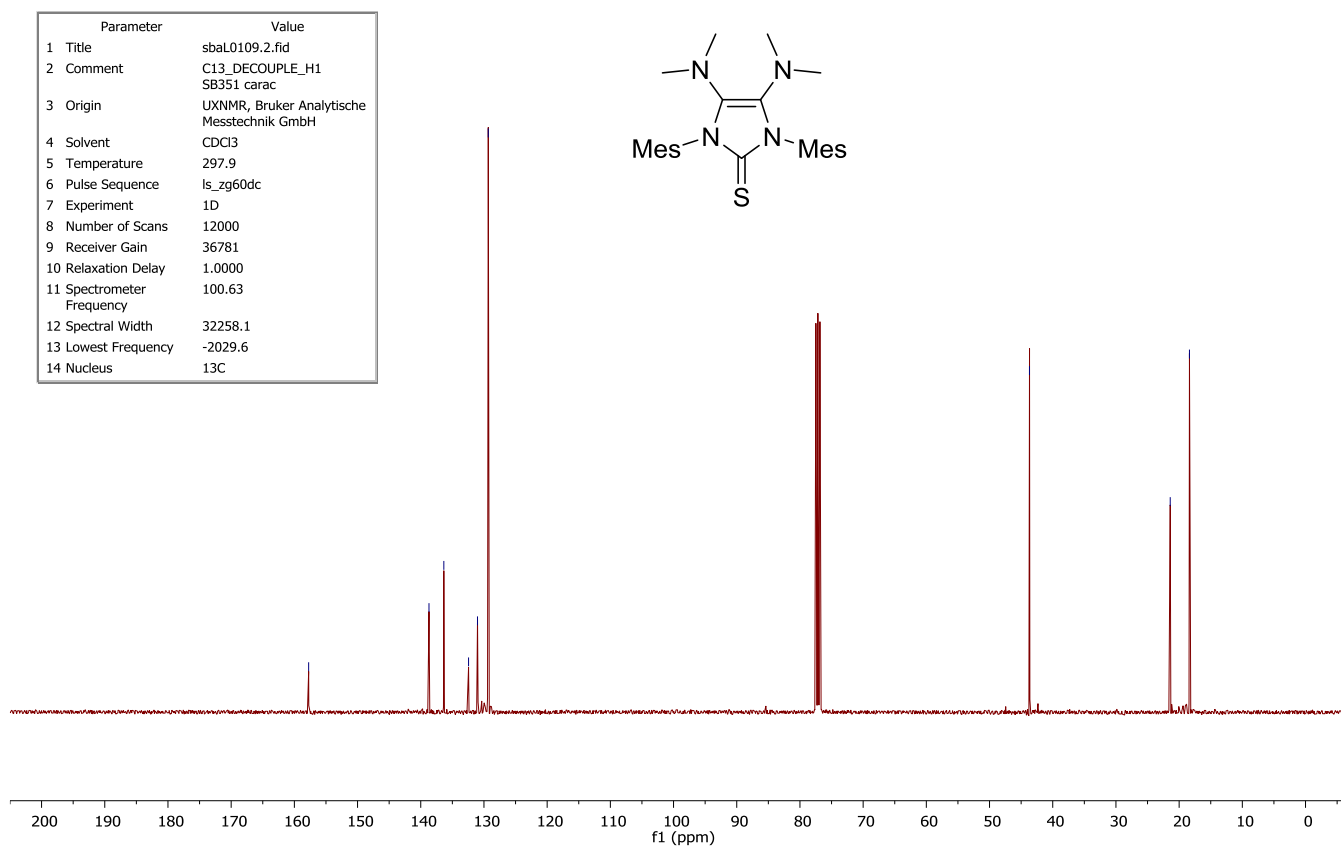



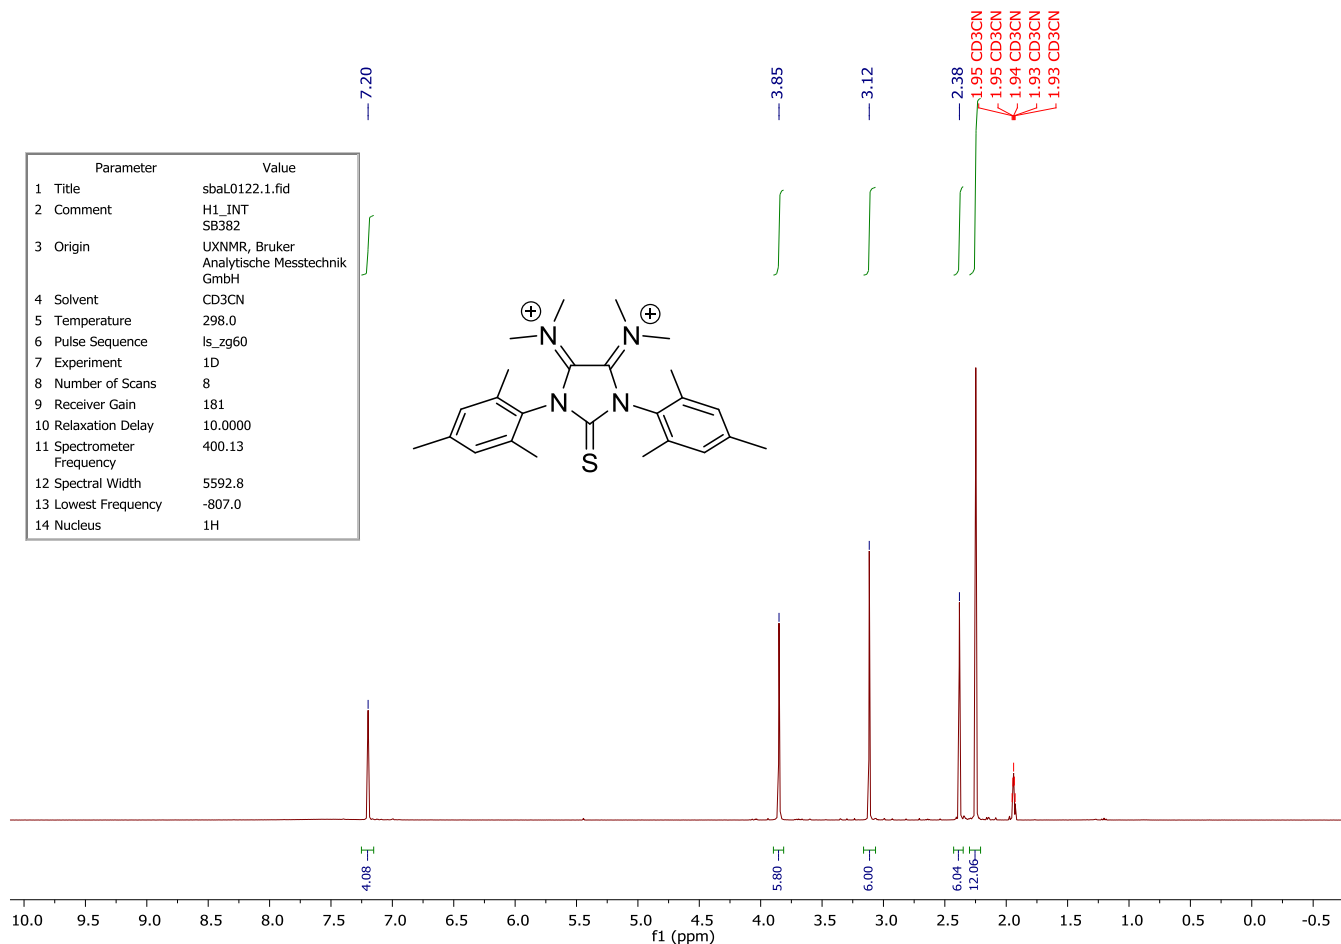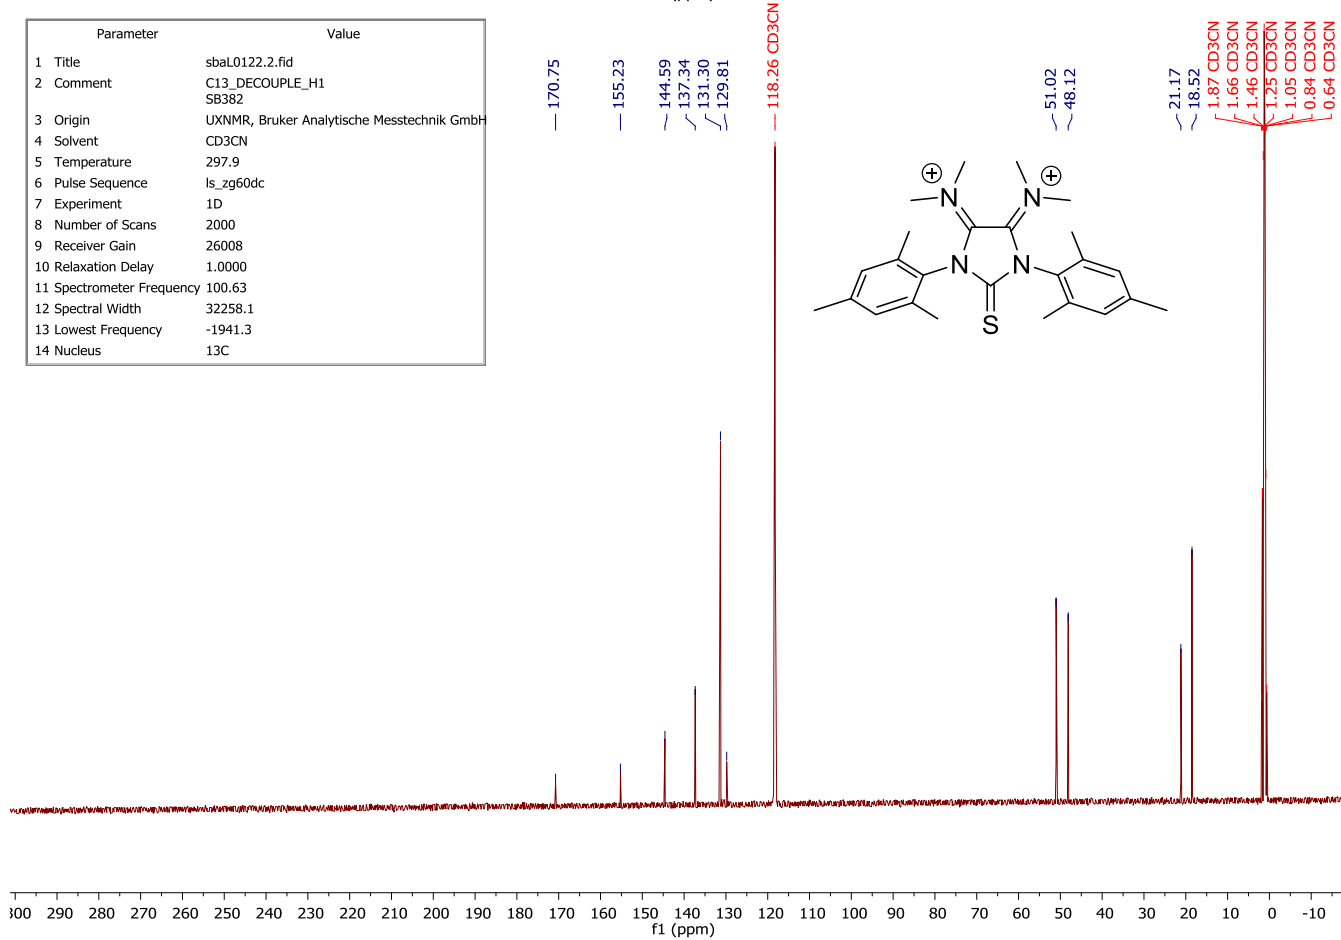

Supplement: c8cc03934h1.pdf [file c8cc03934h1.pdf]
